# Supplementary material
Source: publisher site journal article supplement (https://cdn.jamanetwork.com/ama/content_public/journal/psych/930079/yoi130114supp1_prod.pdf)
Supplement: Supplementary file 1 [file yoi130114supp1_prod.pdf]

## Supplementary Online Content

Alegría M, Carson N, Flores M, et al. Activation, self-management, engagement, and retention in behavioral health care: a randomized clinical trial of the DECIDE intervention. *JAMA Psychiatry*. Published online March 19, 2014.  
doi:10.1001/jamapsychiatry.2013.4519.

**eTable 1.** GEE Modeling of Difference in Number of Visits, Engagement, and Retention Before and After Baseline (Clustering Variable: Site)

**eTable 2.** Mixed Model on Differential Effect of Intervention for Different Groups: Race/Ethnicity (Imputed)

**eTable 3.** Mixed Model on Differential Effect of Intervention by Baseline PAS Score (Imputed)

This supplementary material has been provided by the authors to give readers additional information about their work.

**eTable 1. GEE Modeling of Difference in Number of Visits, Engagement, and Retention Before and After Baseline (Clustering Variable: Site)**

|                                  | Difference in number of visits before and after baseline (n=644) |      |         | Difference in engagement before and after baseline (n=621) <sup>a</sup> |      |         | Retention after baseline (n=644) |      |         |
|----------------------------------|------------------------------------------------------------------|------|---------|-------------------------------------------------------------------------|------|---------|----------------------------------|------|---------|
|                                  | $\beta$                                                          | SE   | P Value | $\beta$                                                                 | SE   | P Value | $\beta$                          | SE   | P Value |
| Intervention                     | -0.43                                                            | 0.50 | 0.39    | -0.01                                                                   | 0.02 | 0.82    | -0.12                            | 0.19 | 0.51    |
| Age (reference=18-34 or missing) |                                                                  |      |         |                                                                         |      |         |                                  |      |         |
| 35-49                            | 0.96                                                             | 0.72 | 0.18    | 0.03                                                                    | 0.01 | 0.02    | 0.04                             | 0.22 | 0.84    |
| 50-64                            | 0.68                                                             | 0.67 | 0.31    | 0.04                                                                    | 0.01 | 0.004   | 0.27                             | 0.26 | 0.30    |
| 65+                              | 0.98                                                             | 0.87 | 0.26    | 0.19                                                                    | 0.06 | 0.001   | -0.92                            | 0.55 | 0.09    |
| Female (reference=male)          | -0.53                                                            | 0.35 | 0.12    | 0.0002                                                                  | 0.02 | 0.99    | -0.07                            | 0.20 | 0.73    |
| Race/Ethnicity (reference=White) |                                                                  |      |         |                                                                         |      |         |                                  |      |         |
| Latino                           | -0.14                                                            | 0.88 | 0.87    | 0.03                                                                    | 0.03 | 0.29    | -0.27                            | 0.29 | 0.36    |
| Black                            | -1.73                                                            | 1.28 | 0.18    | -0.03                                                                   | 0.03 | 0.40    | 0.73                             | 0.45 | 0.11    |
| Other race/ethnicity             | 0.12                                                             | 1.38 | 0.93    | -0.05                                                                   | 0.03 | 0.16    | 0.11                             | 0.46 | 0.81    |
| Education (reference<=11 years)  |                                                                  |      |         |                                                                         |      |         |                                  |      |         |
| 12 years or more                 | -0.37                                                            | 0.41 | 0.36    | 0.01                                                                    | 0.02 | 0.60    | 0.21                             | 0.20 | 0.31    |
| Constant                         | 0.83                                                             | 0.91 | 0.36    | -0.15                                                                   | 0.04 | 0.001   | 1.17                             | 0.41 | 0.004   |

<sup>a</sup> Patients with no scheduled mental health visits are excluded from the engagement analysis (engagement = attended mental health visits/scheduled mental health visits)

**eTable 2. Mixed Model on Differential Effect of Intervention for Different Groups: Race/Ethnicity (Imputed)**

|                                               | Self-Management |       |         |
|-----------------------------------------------|-----------------|-------|---------|
|                                               | coeff.          | SE    | P value |
| Constant                                      | 2.38            | 1.88  | 0.21    |
| Intervention                                  | -0.08           | 1.89  | 0.97    |
| Period [0,1] <sup>a</sup>                     | -1.37           | 0.82  | 0.10    |
| Period*Intervention                           | -1.79           | 1.03  | 0.09    |
| Age (reference=18-34)                         |                 |       |         |
| 35-49                                         | 1.10            | 1.01  | 0.28    |
| 50-64                                         | -1.58           | 1.04  | 0.13    |
| 65+                                           | 0.27            | 2.73  | 0.92    |
| Female (reference=female)                     | -0.32           | 0.84  | 0.70    |
| Race/Ethnicity (reference=white)              |                 |       |         |
| Latino                                        | 0.46            | 1.55  | 0.77    |
| Black                                         | -1.42           | 2.05  | 0.49    |
| Other race/ethnicity <sup>b</sup>             | -4.84           | 2.53  | 0.06    |
| Education (reference<=11 yrs)                 |                 |       |         |
| 12 years or more                              | 1.12            | 0.89  | 0.21    |
| Time in Study                                 | -0.007          | 0.006 | 0.26    |
| Race/Ethnicity*intervention (reference=white) |                 |       |         |
| Latino                                        | 1.85            | 2.04  | 0.37    |
| Black                                         | 3.90            | 3.01  | 0.20    |
| Other Race/Ethnicity <sup>b</sup>             | 12.62           | 3.32  | <.001   |
| <b>Sample size</b>                            | 647             |       |         |

<sup>a</sup> Period=0 between baseline and follow up 2; Period=1 between baseline and follow up 1

<sup>b</sup> Other race/ethnicity includes Asian (n=22), Mixed (n=19), American Indian (n=2), and other (n=2)

**eTable 3. Mixed Model on Differential Effect of Intervention by Baseline PAS Score (Imputed)**

|                                              | Activation |      |         |
|----------------------------------------------|------------|------|---------|
|                                              | $\beta$    | SE   | P value |
| Constant                                     | -1.17      | 0.87 | 0.18    |
| Intervention                                 | 1.45       | 0.53 | 0.008   |
| Period [0,1] <sup>a</sup>                    | -0.38      | 0.44 | 0.39    |
| Period*Intervention                          | -0.46      | 0.62 | 0.47    |
| Age (reference=18-34)                        |            |      |         |
| 35-49                                        | 0.16       | 0.47 | 0.73    |
| 50-64                                        | -0.10      | 0.50 | 0.85    |
| 65+                                          | -0.28      | 1.58 | 0.86    |
| Female (reference=female)                    | -0.40      | 0.46 | 0.38    |
| Race/Ethnicity (reference=white)             |            |      |         |
| Latino                                       | 1.88       | 0.59 | 0.002   |
| Black                                        | 0.78       | 0.76 | 0.31    |
| Other race/ethnicity                         | 0.76       | 0.87 | 0.38    |
| Education (reference=<11 yrs)                |            |      |         |
| 12 years or more                             | 0.52       | 0.43 | 0.23    |
| Time in Study                                | 0.00       | 0.00 | 0.78    |
| Baseline activation score (centered at mean) | -0.37      | 0.04 | <.001   |
| Baseline activation*Intervention             | -0.13      | 0.06 | 0.02    |
| <b>Sample size<sup>b</sup></b>               | 644        |      |         |

<sup>a</sup> Period=0 between baseline and follow up 2; Period=1 between baseline and follow up 1

<sup>b</sup> 3 subjects dropped because of missing values in baseline activation
